# Supplementary material for: Visible light responsive Fe–ZnS/nickel foam photocatalyst with enhanced photocatalytic activity and stability
Source: Royal Society of Chemistry journal article supplement (doi:10.1039/c6ra20187c), 2016-01-01
Supplement: c6ra20187c1.pdf [file c6ra20187c1.pdf]

1 Visible light responsive Fe-ZnS/Nickel foam photocatalyst with enhanced  
2 photocatalytic activity and stability

3 Yanei Xue<sup>a,b</sup>, Rongjun Su<sup>a</sup>, Guangshan Zhang<sup>b,\*</sup>, Qiao Wang<sup>b</sup>, Peng Wang<sup>b</sup>, Wen Zhang<sup>c</sup>,  
4 Zhihong Wang<sup>d,\*</sup>

5  
6 <sup>a</sup> *Department of Life Science and Environmental Science Researching Center, Harbin University*  
7 *of Commerce, Harbin 150076, China*

8 <sup>b</sup> *State Key Laboratory of Urban Water Resource and Environment, School of Municipal and*  
9 *Environmental Engineering, Harbin Institute of Technology, Harbin 150090, China*

10 <sup>c</sup> *John A. Reif, Jr. Department of Civil & Environmental Engineering, New Jersey Institute of*  
11 *Technology, Newark, NJ 07102, USA*

12 <sup>d</sup> *Department of Physics, Harbin Institute of Technology, Harbin 150090, China*

13

14

15

16

17

18

19

20

21

22

23

24 \* Corresponding author at: State Key Laboratory of Urban Water Resource and Environment,  
25 School of Municipal and Environmental Engineering, Harbin Institute of Technology, No. 73  
26 Huanghe Road, Nangang District, Harbin 150090, China. Tel.: +86-451-86283557.

27 *E-mail addresses:* gszhanghit@gmail.com (G.S. Zhang), wangzhihong@hit.edu.cn (Z.H. Wang)

28

29

30

## 31 S1. Preparation of Fe-doped ZnS decorated on nickel foam

### 32 S1.1. Fe-doped ZnS

33 Fe-doped ZnS catalyst was synthesized under microwave irradiation following  
34 the same method published in our previous work.<sup>1</sup> The chemical composition of the  
35 catalyst determined with ICP-MS and IC was  $Zn_{0.9\pm 0.08}Fe_{0.1\pm 0.02}S$ . Briefly, 50 mL zinc  
36 acetate ( $0.009 \text{ mol}\cdot\text{L}^{-1}$ ), 50 mL ferric nitrate ( $0.001 \text{ mol}\cdot\text{L}^{-1}$ ) and 50 mL sodium  
37 sulfide ( $0.01 \text{ mol}\cdot\text{L}^{-1}$ ) were mixed into a 250 mL round flask, with pH adjusted to the  
38 appropriately (5.0). Then, the mixed solution was transferred into a microwave oven  
39 immediately and microwaved for 10 min under the power of 150 W with magnetic  
40 stirring. When the reaction was finished, the mixed solution was placed at room  
41 temperature for cooling. Afterwards, the mixture was centrifuged at 4,000 rpm for 10  
42 min, and then the supernatant was discarded. The precipitate was washed by ethanol  
43 and distilled water for two times, respectively. Finally, the resulting solid was dried in  
44 vacuum oven at  $60 \text{ }^\circ\text{C}$  for 5 h, and ground into powders for storage.

### 45 S1.2. Fe-doped ZnS decorated on nickel foam

46 The hybridization of ZnFeS and nickel foam was achieved using a coupling  
47 method because of its low cost and controllability. A large sheet of raw porous nickel  
48 foam with a thickness of 3 mm was cut into small rectangular pieces of  $15 \text{ mm}\times 30$   
49 mm. The photo of the raw nickel foam was shown in Figure S1.

50 *Step one* (pretreatment of nickel foam): the nickel foam was washed with soap  
51 and clean water with ultrasound for 3 min, respectively. Then the foam was separately  
52 soaked in 10% sodium hydroxide and hot water for 10 s. Finally, the foam was put in  
53 boiling water for 3 min for disinfecting, and placed at room temperature for 12 h.

54 *Step two* (preparation of silane solution): 85 mL deionized water was taken into a  
55 100 mL beaker, and mixed with 5 mL Bis-(3-[triethoxysilyl]-propyl)-tetrasulfide.  
56 After appropriate treatment, lower aqueous phase solution was spared.

57 *Step three* (decorating ZnFeS catalyst onto nickel foam): a certain amount of  
58 ZnFeS particles were added in the silane solution and ultrasonic dispersed for 10 min.

59 The pretreated nickel foam was soaked into the suspension for 20 min, dried with  
60 nitrogen after taken out, and solidified at 100 °C for 1 h.

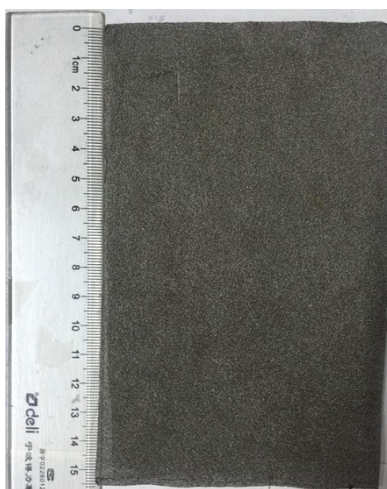

61  
62  
63

**Fig. S1** Photo of the raw nickel foam.

## S2. The loading amount of ZnFeS/nickel foam

The elemental distribution of the hybrid catalyst was performed using both Ion Chromatography (IC) on a Dionex AS50 and inductively coupled plasma mass spectrometry (ICP-MS) on a Perkin Elmer Optima NexIon™ 300D. For the elemental distribution, 50 mg of the powder catalyst were digested by adding 2 mL HNO<sub>3</sub> (67–70%, V/V) and 1 mL H<sub>2</sub>O<sub>2</sub> (30 wt% in H<sub>2</sub>O). Then the suspension was heated on a hotplate at 150 °C for 20 min with a watch glass covering the beaker. The metal concentrations were measured three times to confirm the significance.

The loading amount (w%) was calculated by gravimetry through following equation:

$$w = \frac{m_1}{m_1 + m_0} \times 100\% \quad (1)$$

where  $m_1$  and  $m_0$  are the weights of ZnFeS and nickel foam, respectively.

In application of nickel foam as the catalyst substrate, the loading amount of ZnFeS/nickel foam reached 2.2 wt% by a combination of microwave irradiation synthesis and coupling method.

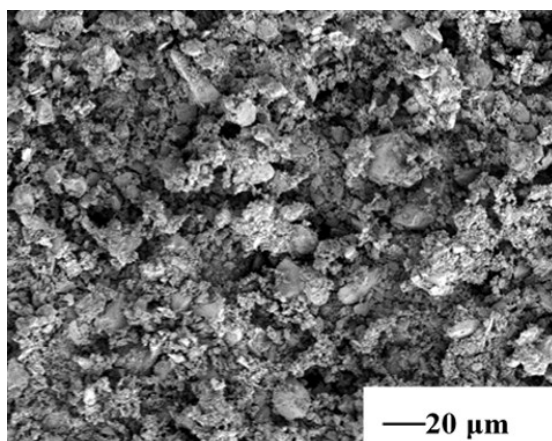

**Fig. S2** SEM images of ZnFeS catalysts (20 μm).

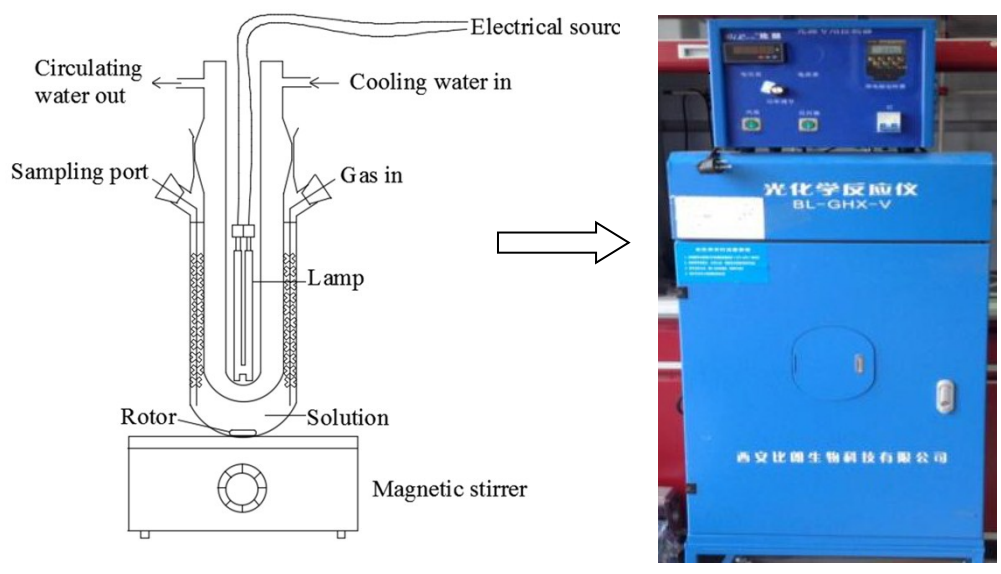

**Fig. S3** Schematic diagram of experimental setup.

## Notes and references

- 1 G. S. Zhang, Y. N. Xue, R. Su, Q. Wang, W. Zhang, Y. Yuan and P. Wang, *Journal of Photochemistry and Photobiology A: Chemistry*, 2016, doi:10.1016/j.jphotochem.2016.1006.1004.
